# Supplementary material for: Adaptation and Dissemination of Korean Medicine Clinical Practice Guidelines for Traffic Injuries
Source: Healthcare (Basel). 2022 Jun 22;10(7):1166. doi: 10.3390/healthcare10071166 (PMC9316782; doi:10.3390/healthcare10071166)
Supplement: Supplementary file 1 [file healthcare-10-01166-s001.zip › Supplementary Figure S1.pdf]

## Clinical algorithm for traffic injuries

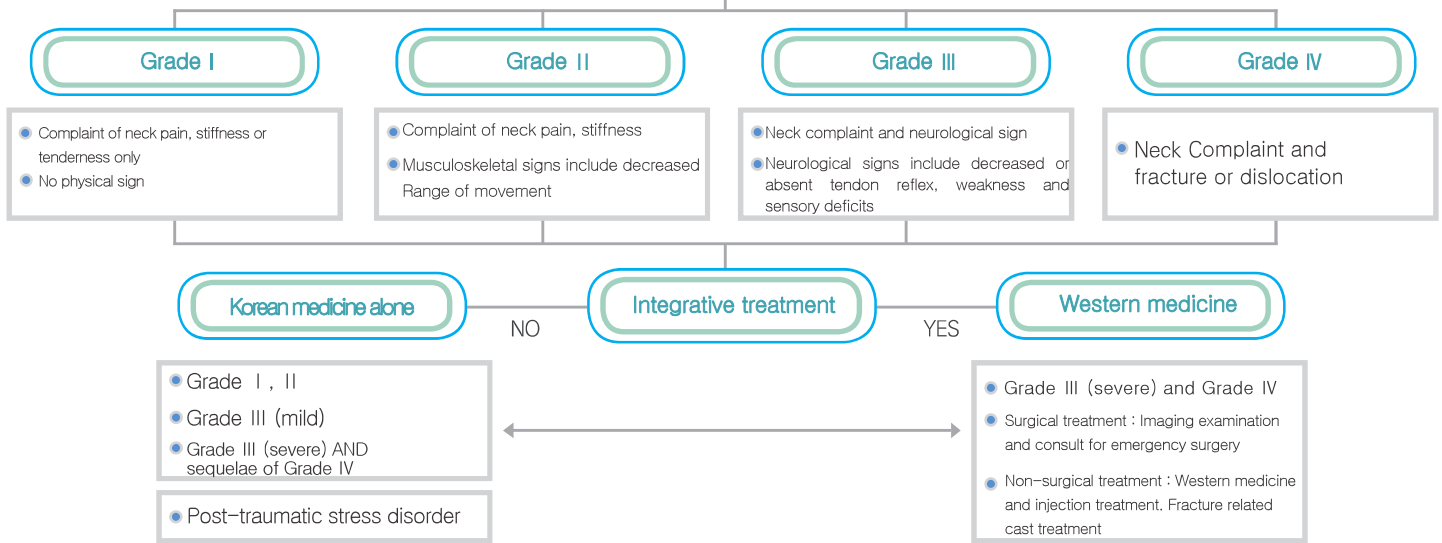

### Moxibustion

- Alone treatment for neck/Low back pain (C/Very low)
- Combination treatment for neck pain (C/Low)
- Combination treatment for Low back pain (C/Very low)
  - Ashi point and combine with cupping
  - Consider precautions such as infection during venesection

### Cupping

- Alone or Combination treatment for neck/Low back pain (C/Very low)
  - Ashi point and combine with cupping
  - Consider precautions such as infection during venesection

### Physiotherapy

- Combination treatment with ICT, TENS, MW, SSP (C/Very low)
  - Do-in exercise therapy, Musculotendinous releasing therapy

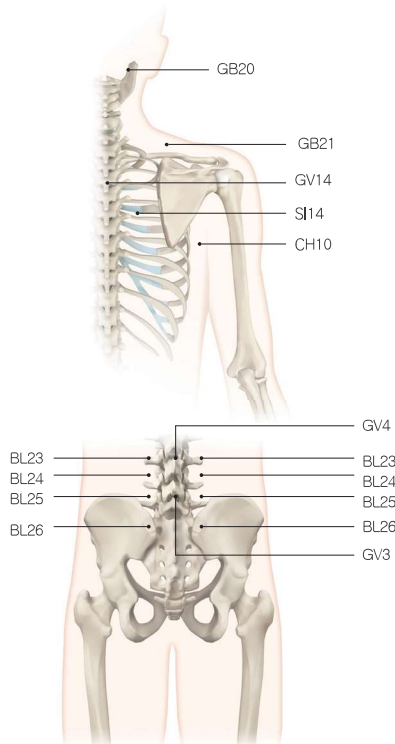

### Chuna & Pharmacopuncture

- Chuna and Pharmacopuncture combination treatment for neck/Low back pain (C/Very low)
- Pharmacopuncture with conventional treatment with Chuna for neck pain (C/Low)
- Chuna and conventional treatment with pharmacopuncture for neck pain (B/moderate)

### Chuna

- Alone treatment for neck/Low back pain (C/Very low)
- Combination treatment for neck pain (C/Low)
- Combination treatment for Low back pain (C/Low)
  - Consider simple Chuna technique (fascia, joint movement, joint distraction) and complex Chuna technique (joint correction) as chuna for pain and limited range of motion.

### Traffic injury

### Pattern syndrome

### 瘀血

- Consider primary

### 痰飲

### 氣滯

### 血虛

### 氣虛

- Detailed diagnoses are made based on each patient's situation or the opinion of a Korean medicine doctor.

### Electroacupuncture/ Acupuncture

- Combination treatment with acupuncture for neck pain (B/Moderate)
- Combination treatment with electroacupuncture for neck pain (B/Moderate)
- Combination treatment with MSAT for neck pain (B/Moderate)
- Combination treatment with acupuncture for Low back pain (C/Very low)
- Combination treatment with electroacupuncture for Low back pain (C/Low)
  - SI14, GB20, GB21, TE05, GV14, and Ashi-point
  - Hua-Tuo-Jia-Ji-Xue, BL25, BL23 and Ashi-point
  - Concurrent electroacupuncture for high-intensity pain

### Pharmacopuncture

- Alone treatment for neck/Low back pain (C/Very low)
- Combination treatment for neck pain (B/Moderate)
- Combination treatment for Low back pain (C/Very low)
  - Consider using bee venom, hwalyeolhwaeo, anti-inflammatory for analgesia, and muscle relaxation.
  - Neck pain : GV16, GB20, GB21, GV14
  - Low back pain : BL23, BL24, BL25, GV3, GB30, Hua-Tuo-Jia-Ji-Xue
  - \* Bee venom is must performed after skin test

### Herbal medicine

- Alone or combination treatment with herbal medicine for neck/Low back pain (C/Very low)
  - Detailed prescription is possible according to the individual patient's pattern syndrome
