# Supplementary material for: Adaptation and Dissemination of Korean Medicine Clinical Practice Guidelines for Traffic Injuries
Source: Healthcare (Basel). 2022 Jun 22;10(7):1166. doi: 10.3390/healthcare10071166 (PMC9316782; doi:10.3390/healthcare10071166)
Supplement: Supplementary file 1 [file healthcare-10-01166-s001.zip › Supplementary Figure S2.pdf]

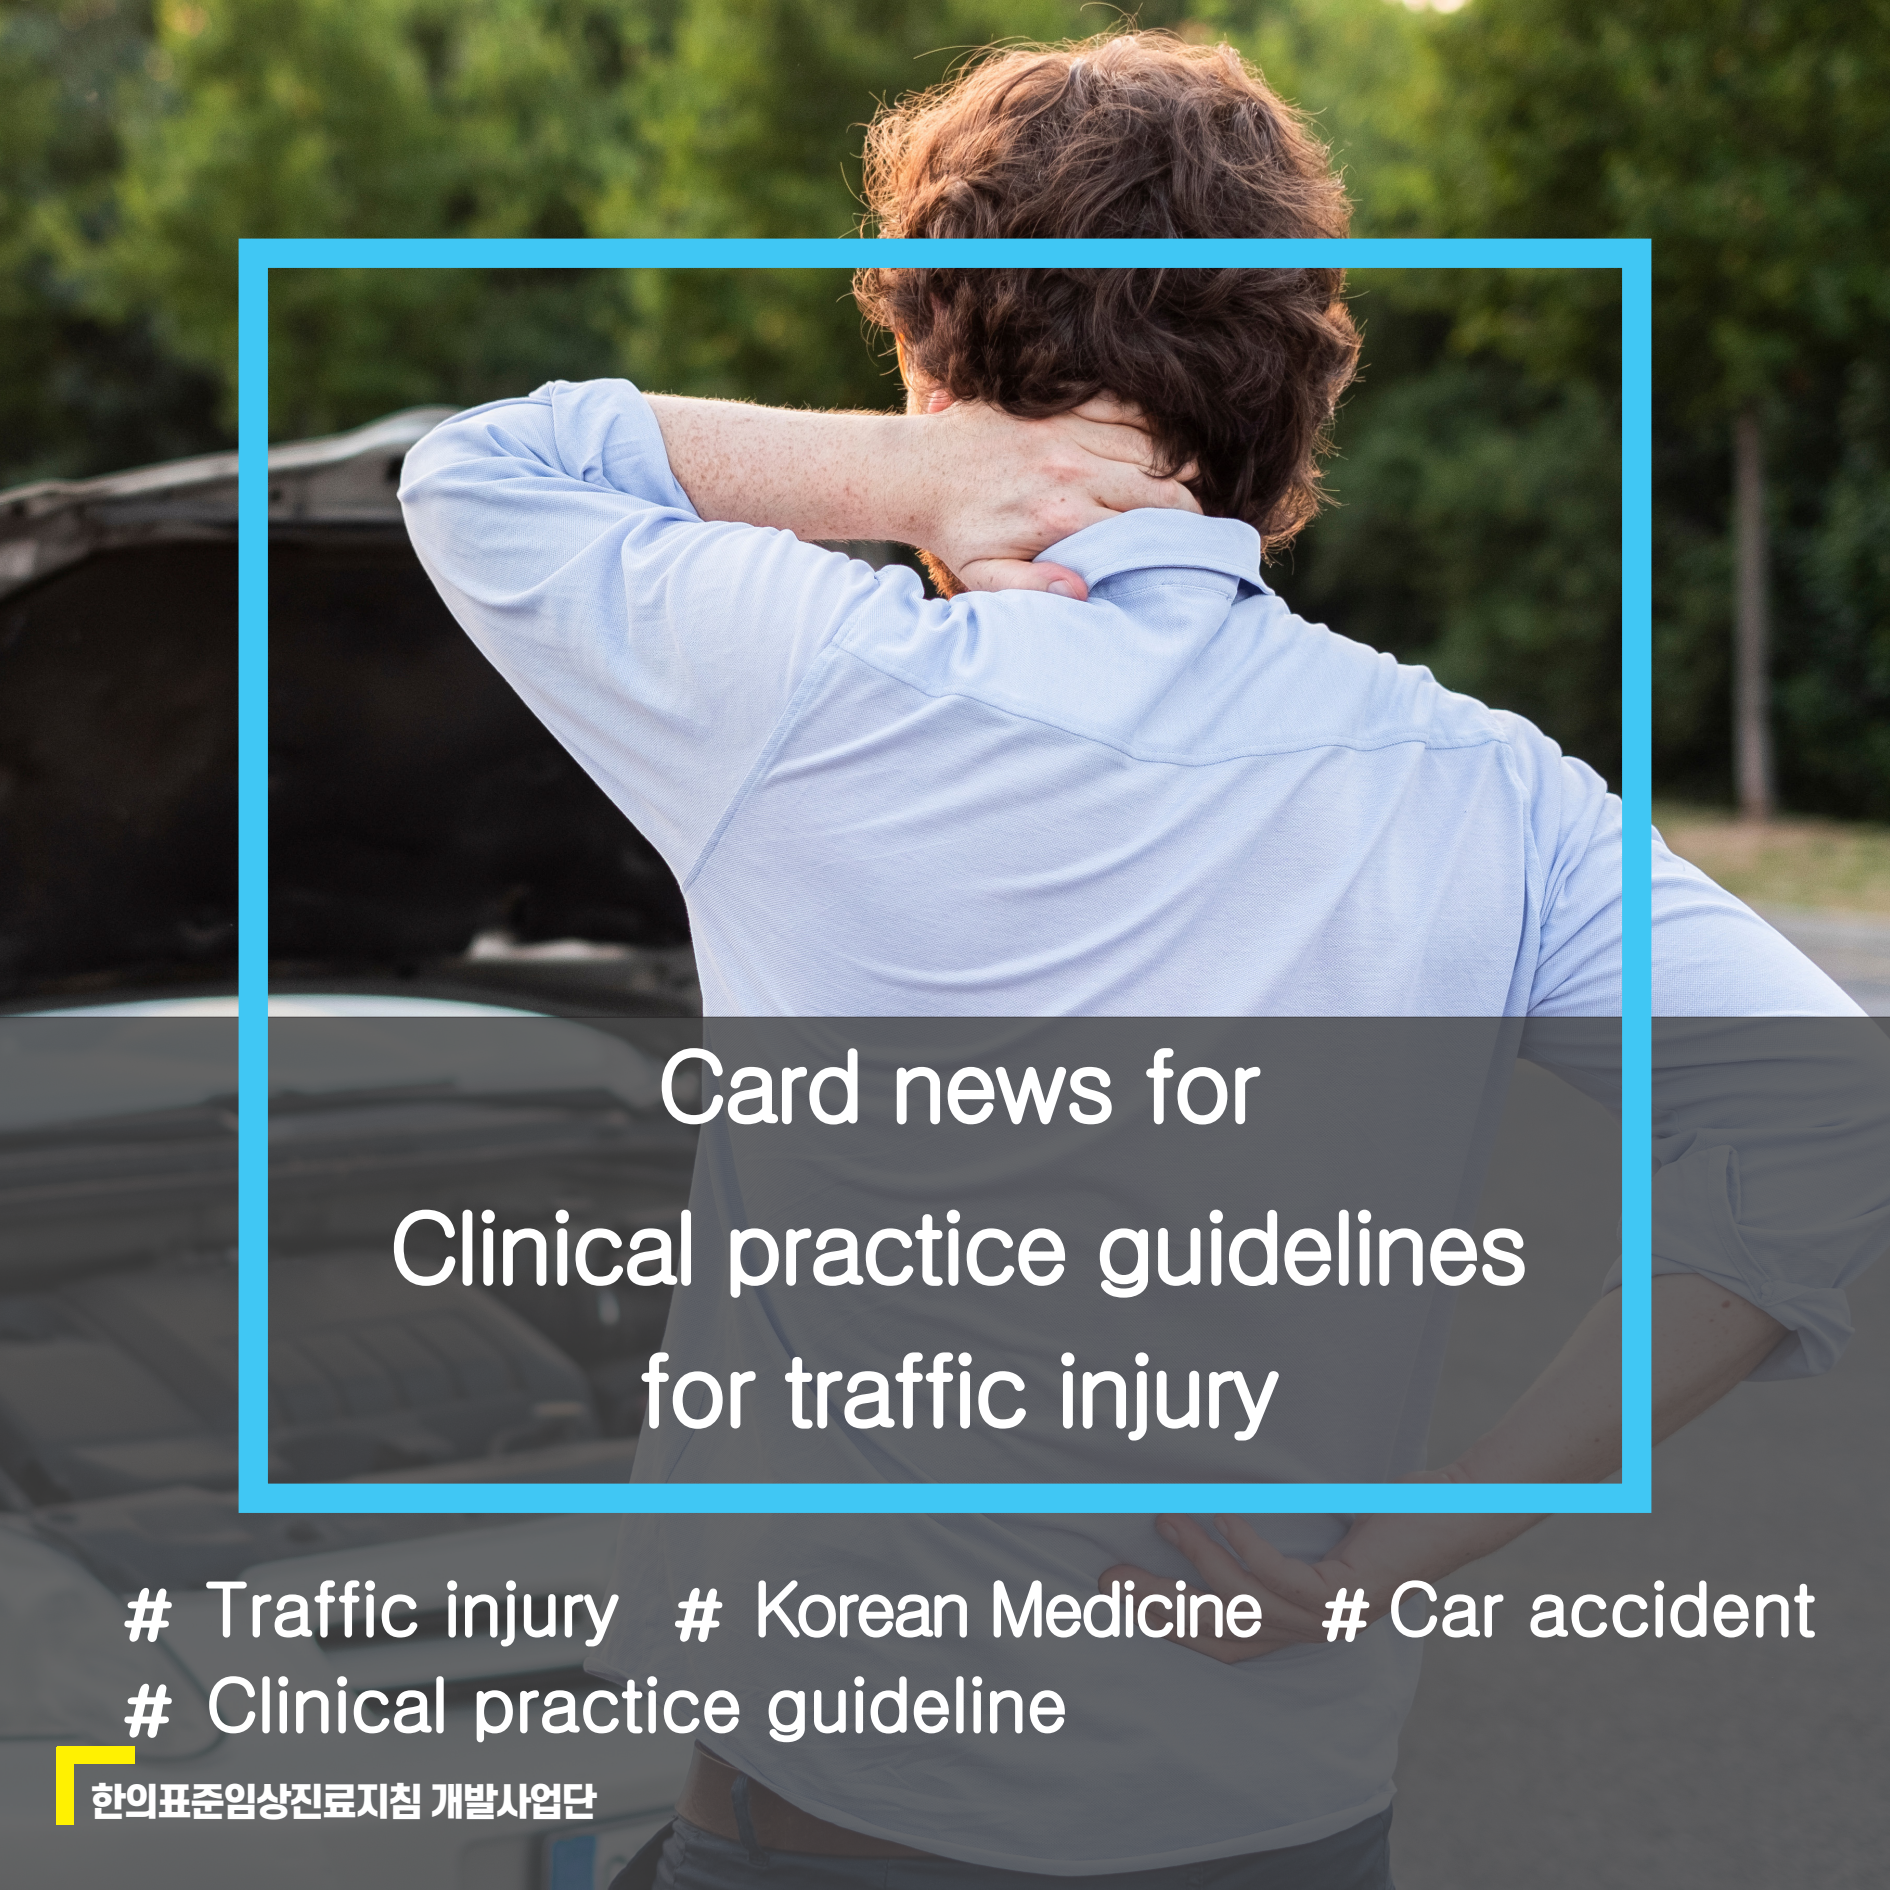A photograph of a person with brown hair, seen from behind, wearing a light blue long-sleeved shirt. They are holding their neck with both hands, suggesting pain or injury. The background is a blurred outdoor scene with green trees and a dark car. A semi-transparent grey rectangle with a blue border is overlaid on the image, containing the main title and hashtags.

# Card news for Clinical practice guidelines for traffic injury

# Traffic injury # Korean Medicine # Car accident  
# Clinical practice guideline

## Traffic injury

As the impact of an accident is transmitted to the body, various ligaments and muscles around the spine are damaged, causing various musculoskeletal symptoms such as **neck pain, stiffness, back pain, numbness, headache, dizziness, fatigue, and depression.**

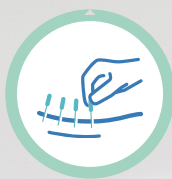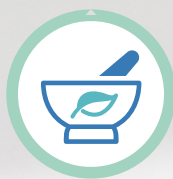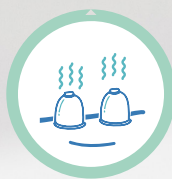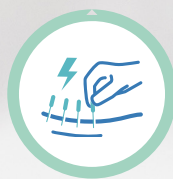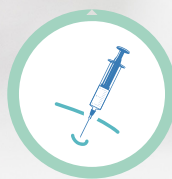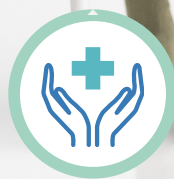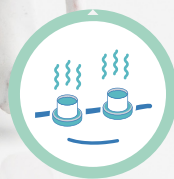

The goal of Korean medicine treatment is to recover the damaged area by removing the **blood stagnation (瘀血).**

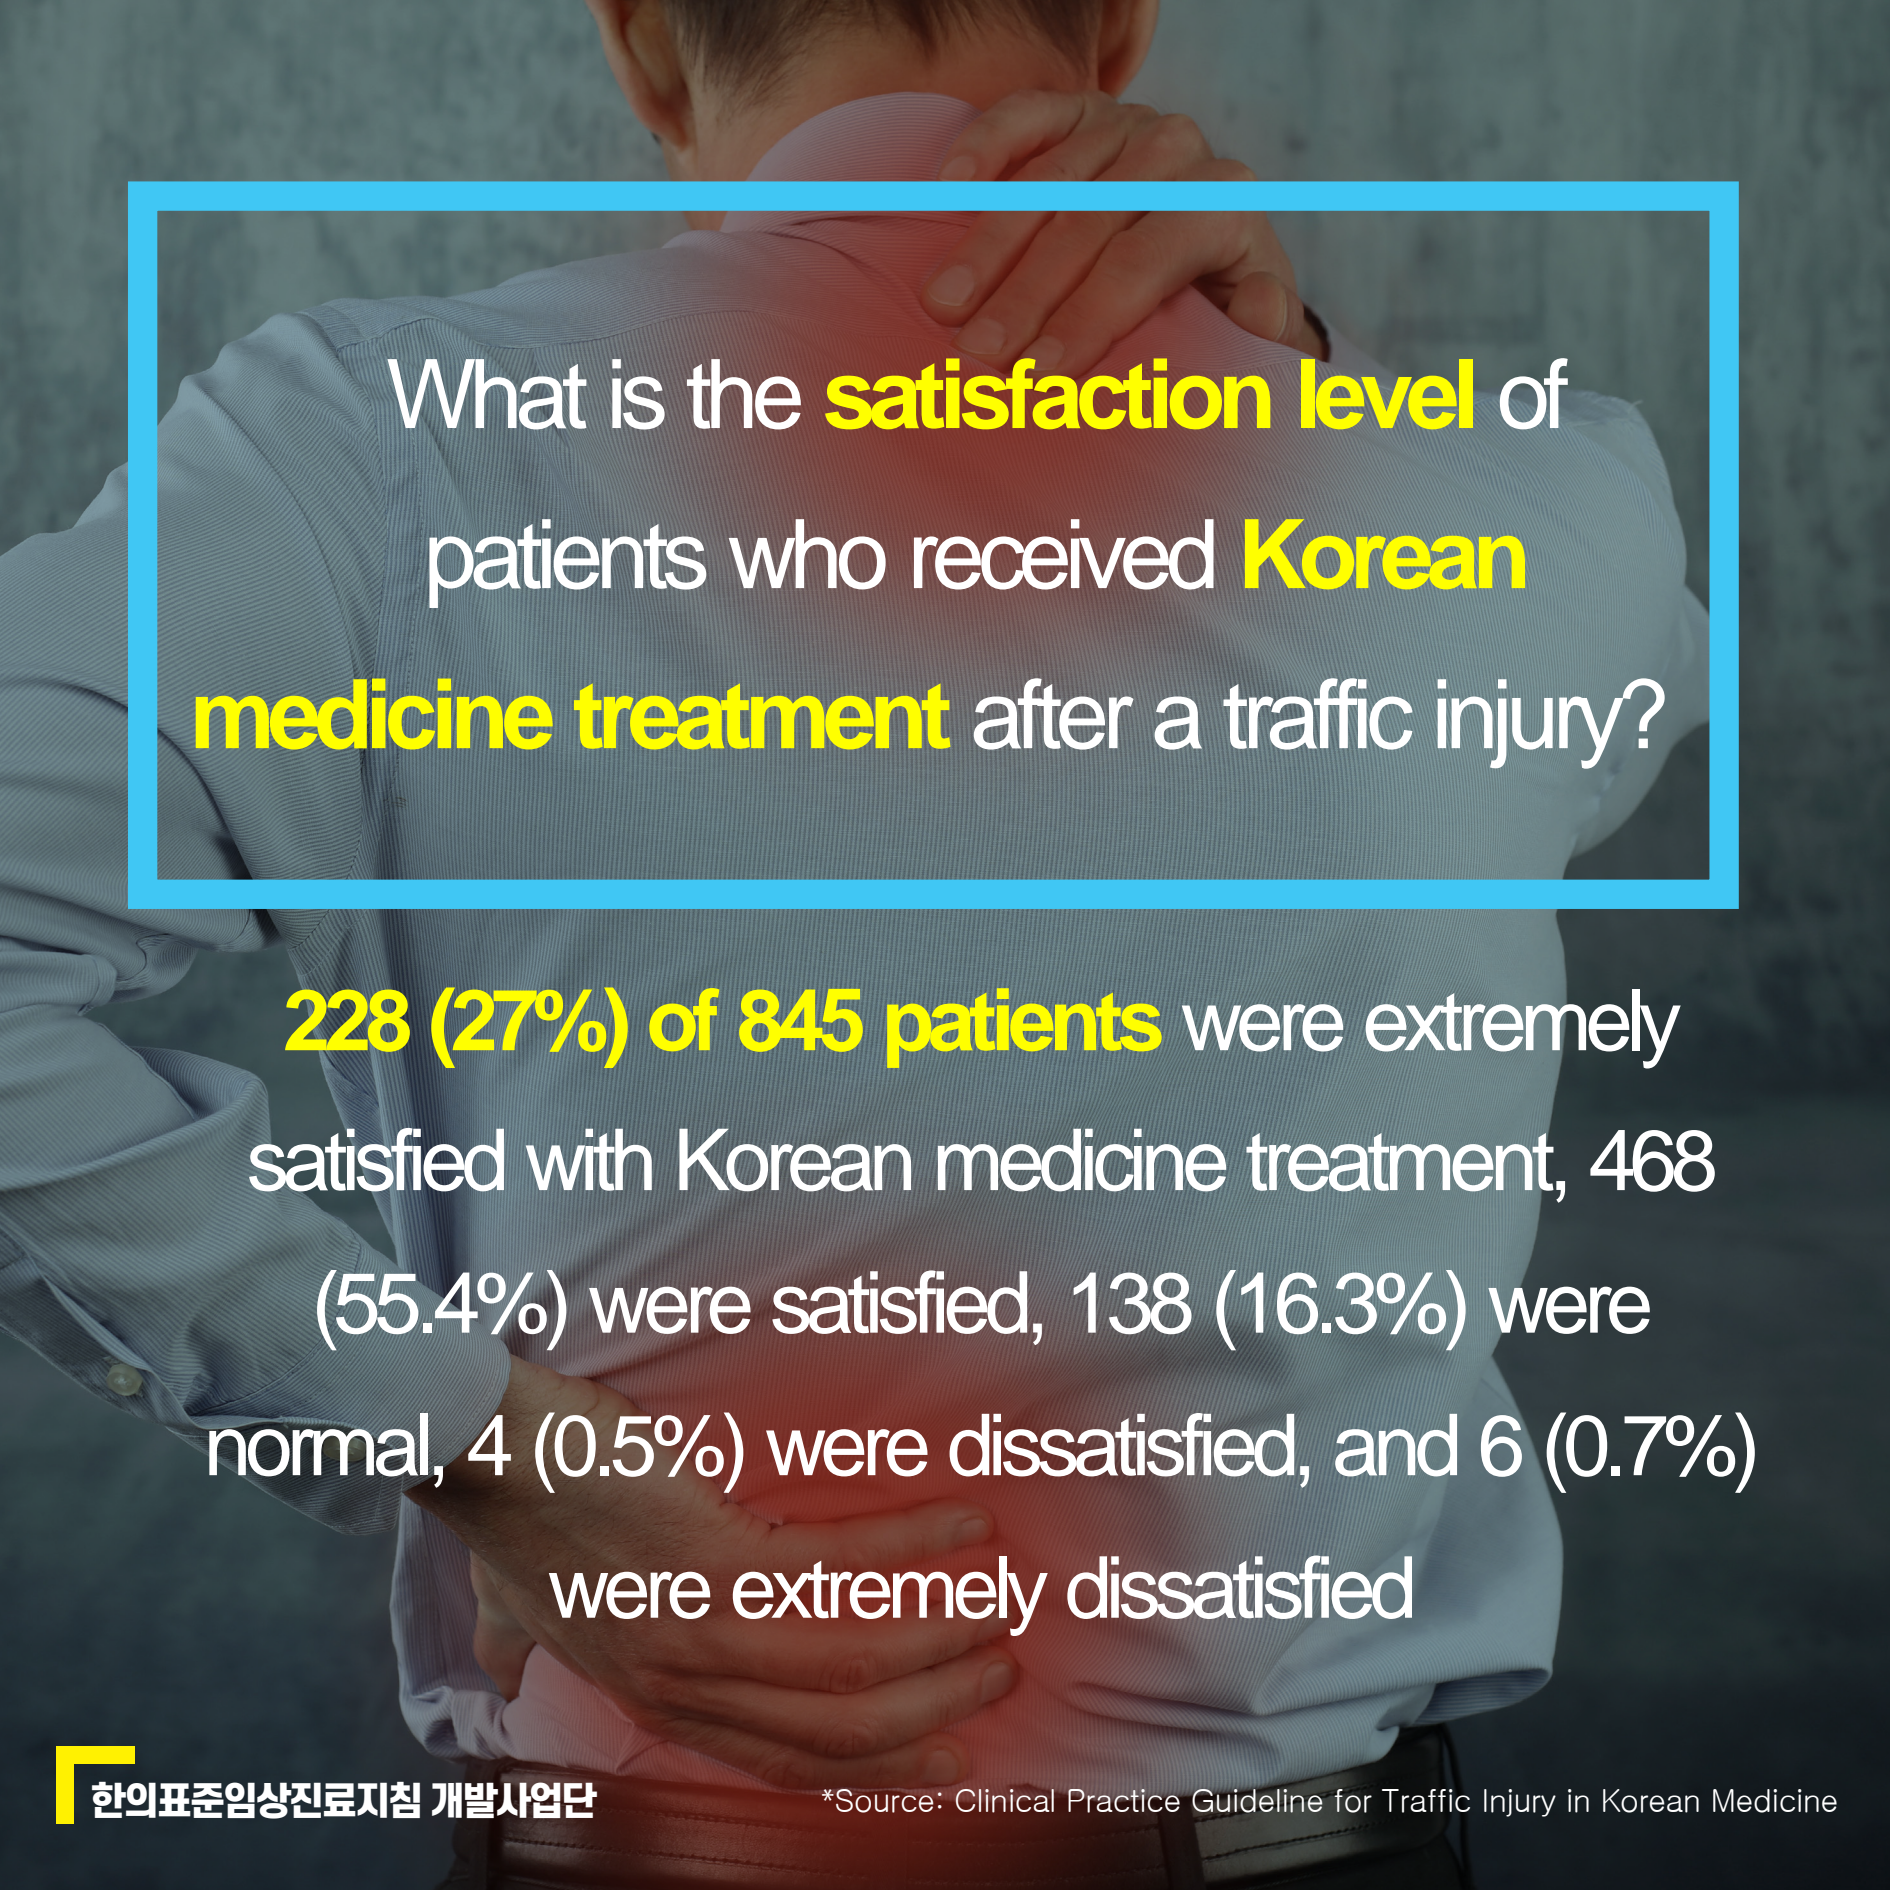

What is the **satisfaction level** of patients who received **Korean medicine treatment** after a traffic injury?

**228 (27%) of 845 patients** were extremely satisfied with Korean medicine treatment, 468 (55.4%) were satisfied, 138 (16.3%) were normal, 4 (0.5%) were dissatisfied, and 6 (0.7%) were extremely dissatisfied

# Electroacupuncture

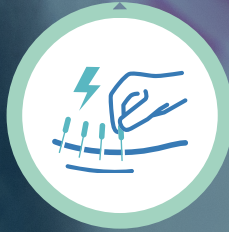

evidence level

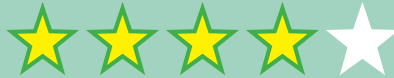

Grade

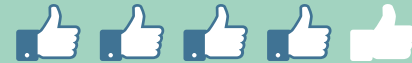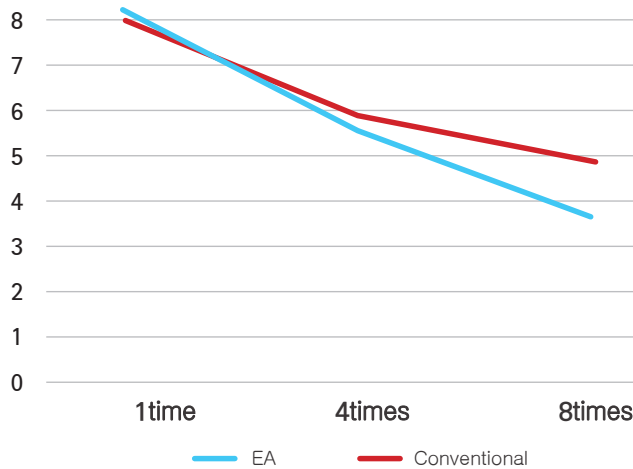

Neck pain intensity change in 4 weeks

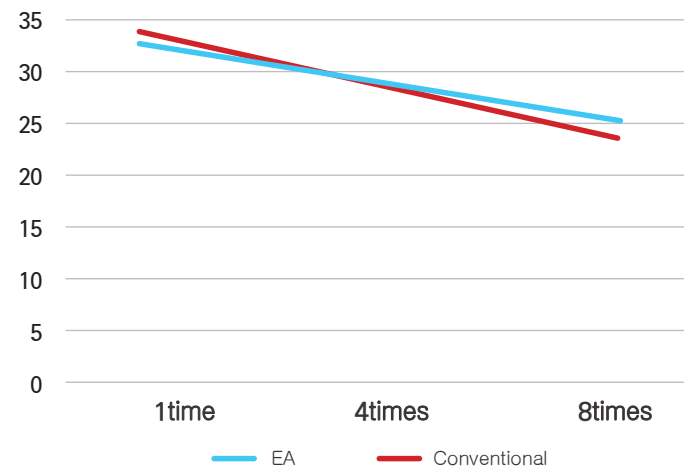

Neck disability index improvement in 4 weeks

- Electroacupnucture was **effective** for neck pain and functional improvement after traffic injury
- **Analgesic effect** through electroacupuncture stimulation

# Motion-style acupuncture technique

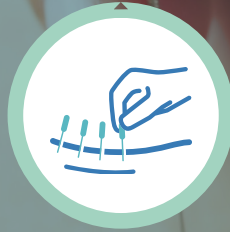

evidence level

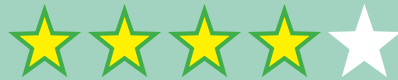

Grade

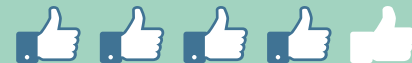

neck pain change according to the course of treatment

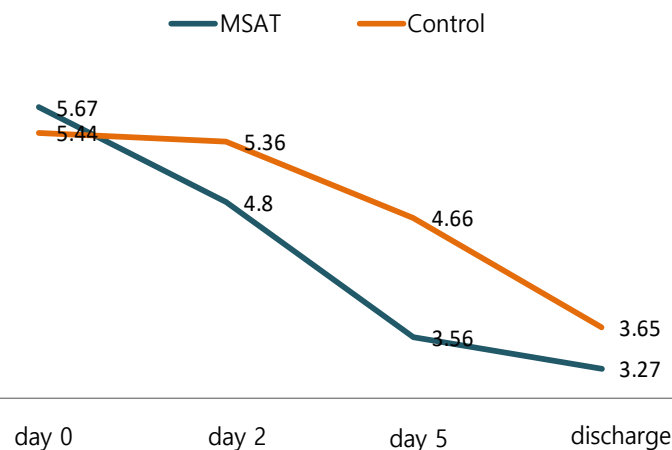

MSAT and concurrent Korean medicine treatment were combined, pain alleviation and recovery of the neck's range of motion were decrease faster than when concurrent Korean medicine treatment performed alone.

MSAT

Motion-Style Acupuncture Technique (MSAT) is one of the acupuncture techniques used to reduce musculoskeletal pain in Korean oriental medicine, which combines simultaneous breathing and exercise activities in acupuncture treatment.

# Pharmacopuncture

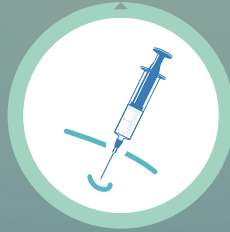

evidence level

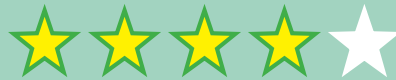

Grade

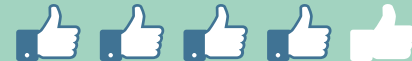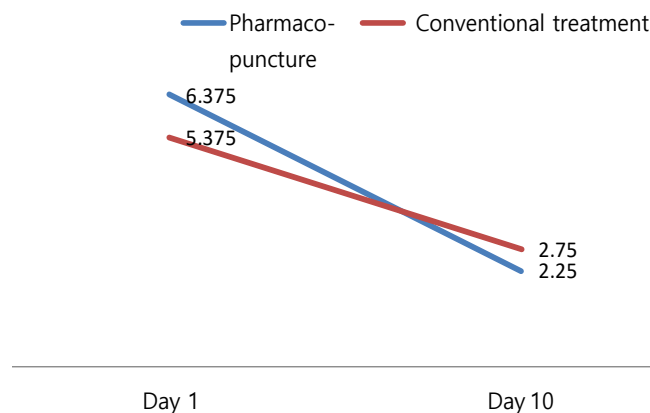

Neck pain intensity change

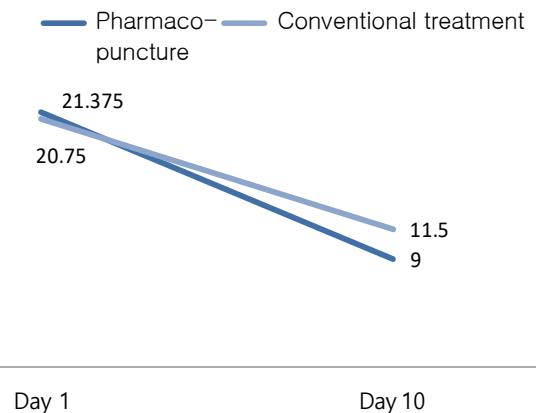

Neck disability index improvement

Pharmacopuncture is **effective for neck pain and function improvement with traffic injury!**

# Chuna manual therapy

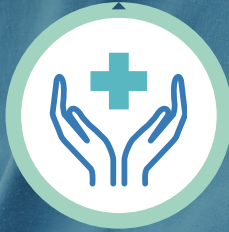

evidence level

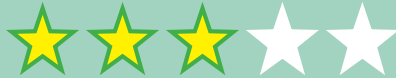

Grade

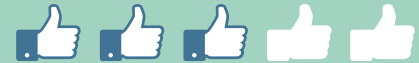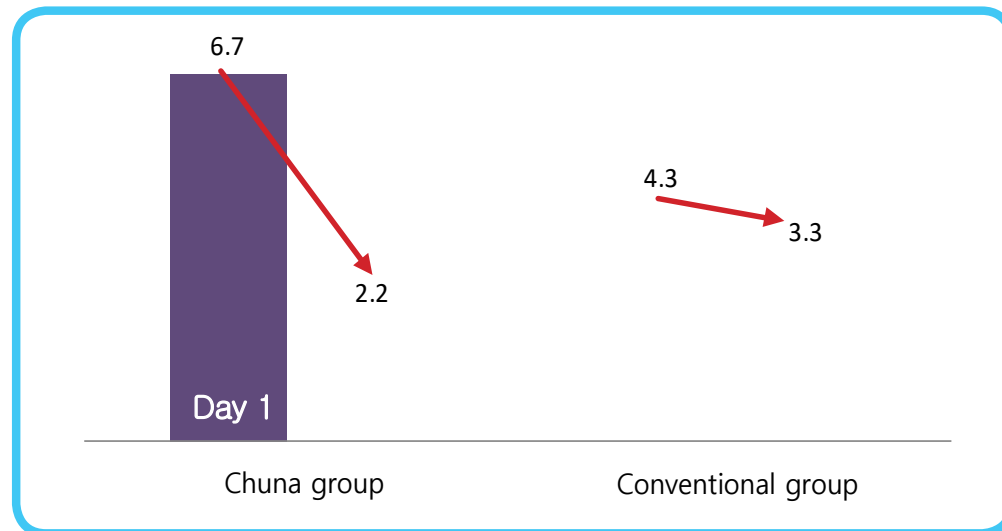

Changes pain intensity

Chuna manual therapy is **effective in decreasing pain intensity and improving function** of low back after traffic injury.

# Pharmacopuncture + chuna manual therapy

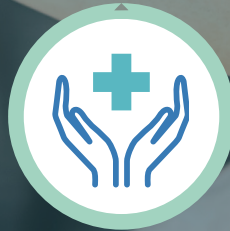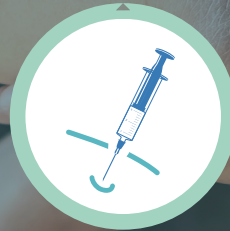

Evidence level

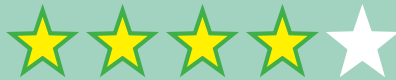

Grade



Neck disability index improvement in 4 weeks

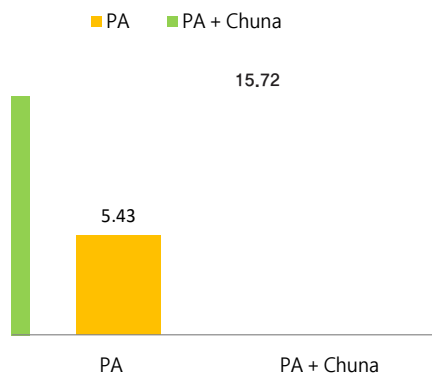

Neck pain intensity change in 4 weeks

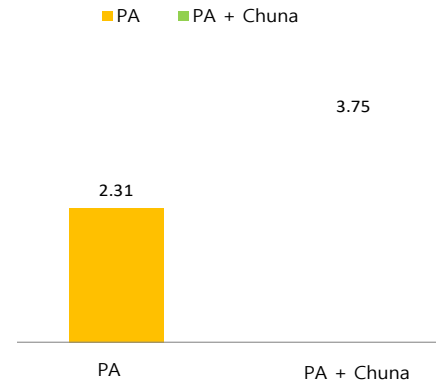

When **acupuncture and chuna treatment were combined**, it was **more effective** in reducing neck pain and improving functions than treating acupuncture only

# After traffic injury,

Acupuncture, electroacupuncture,  
pharmacopuncture, chuna, etc.  
are effective!

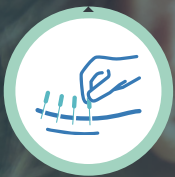

Acupuncture Electro-

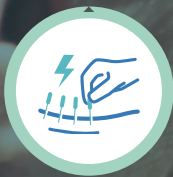

Acupuncture

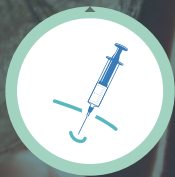

Pharma-  
copuncture

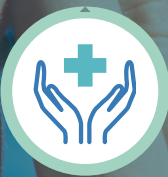

Chuna Manual  
Therapy

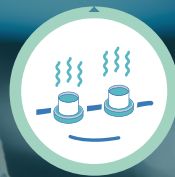

Moxibustion

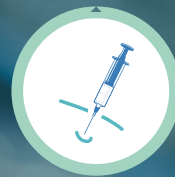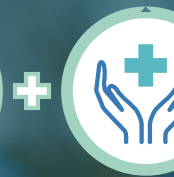

Pharmacopuncture +  
Chuna manual Therapy

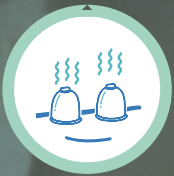

Cupping

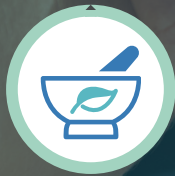

Herbal medicine

Cupping and herbal medicine treatment  
are also effective!

If you feel pain and have limited movement  
after a car accident, visiting **the nearest  
korean medicine clinic/hospital** for counseling  
is the shortcut to a quick return to daily life!

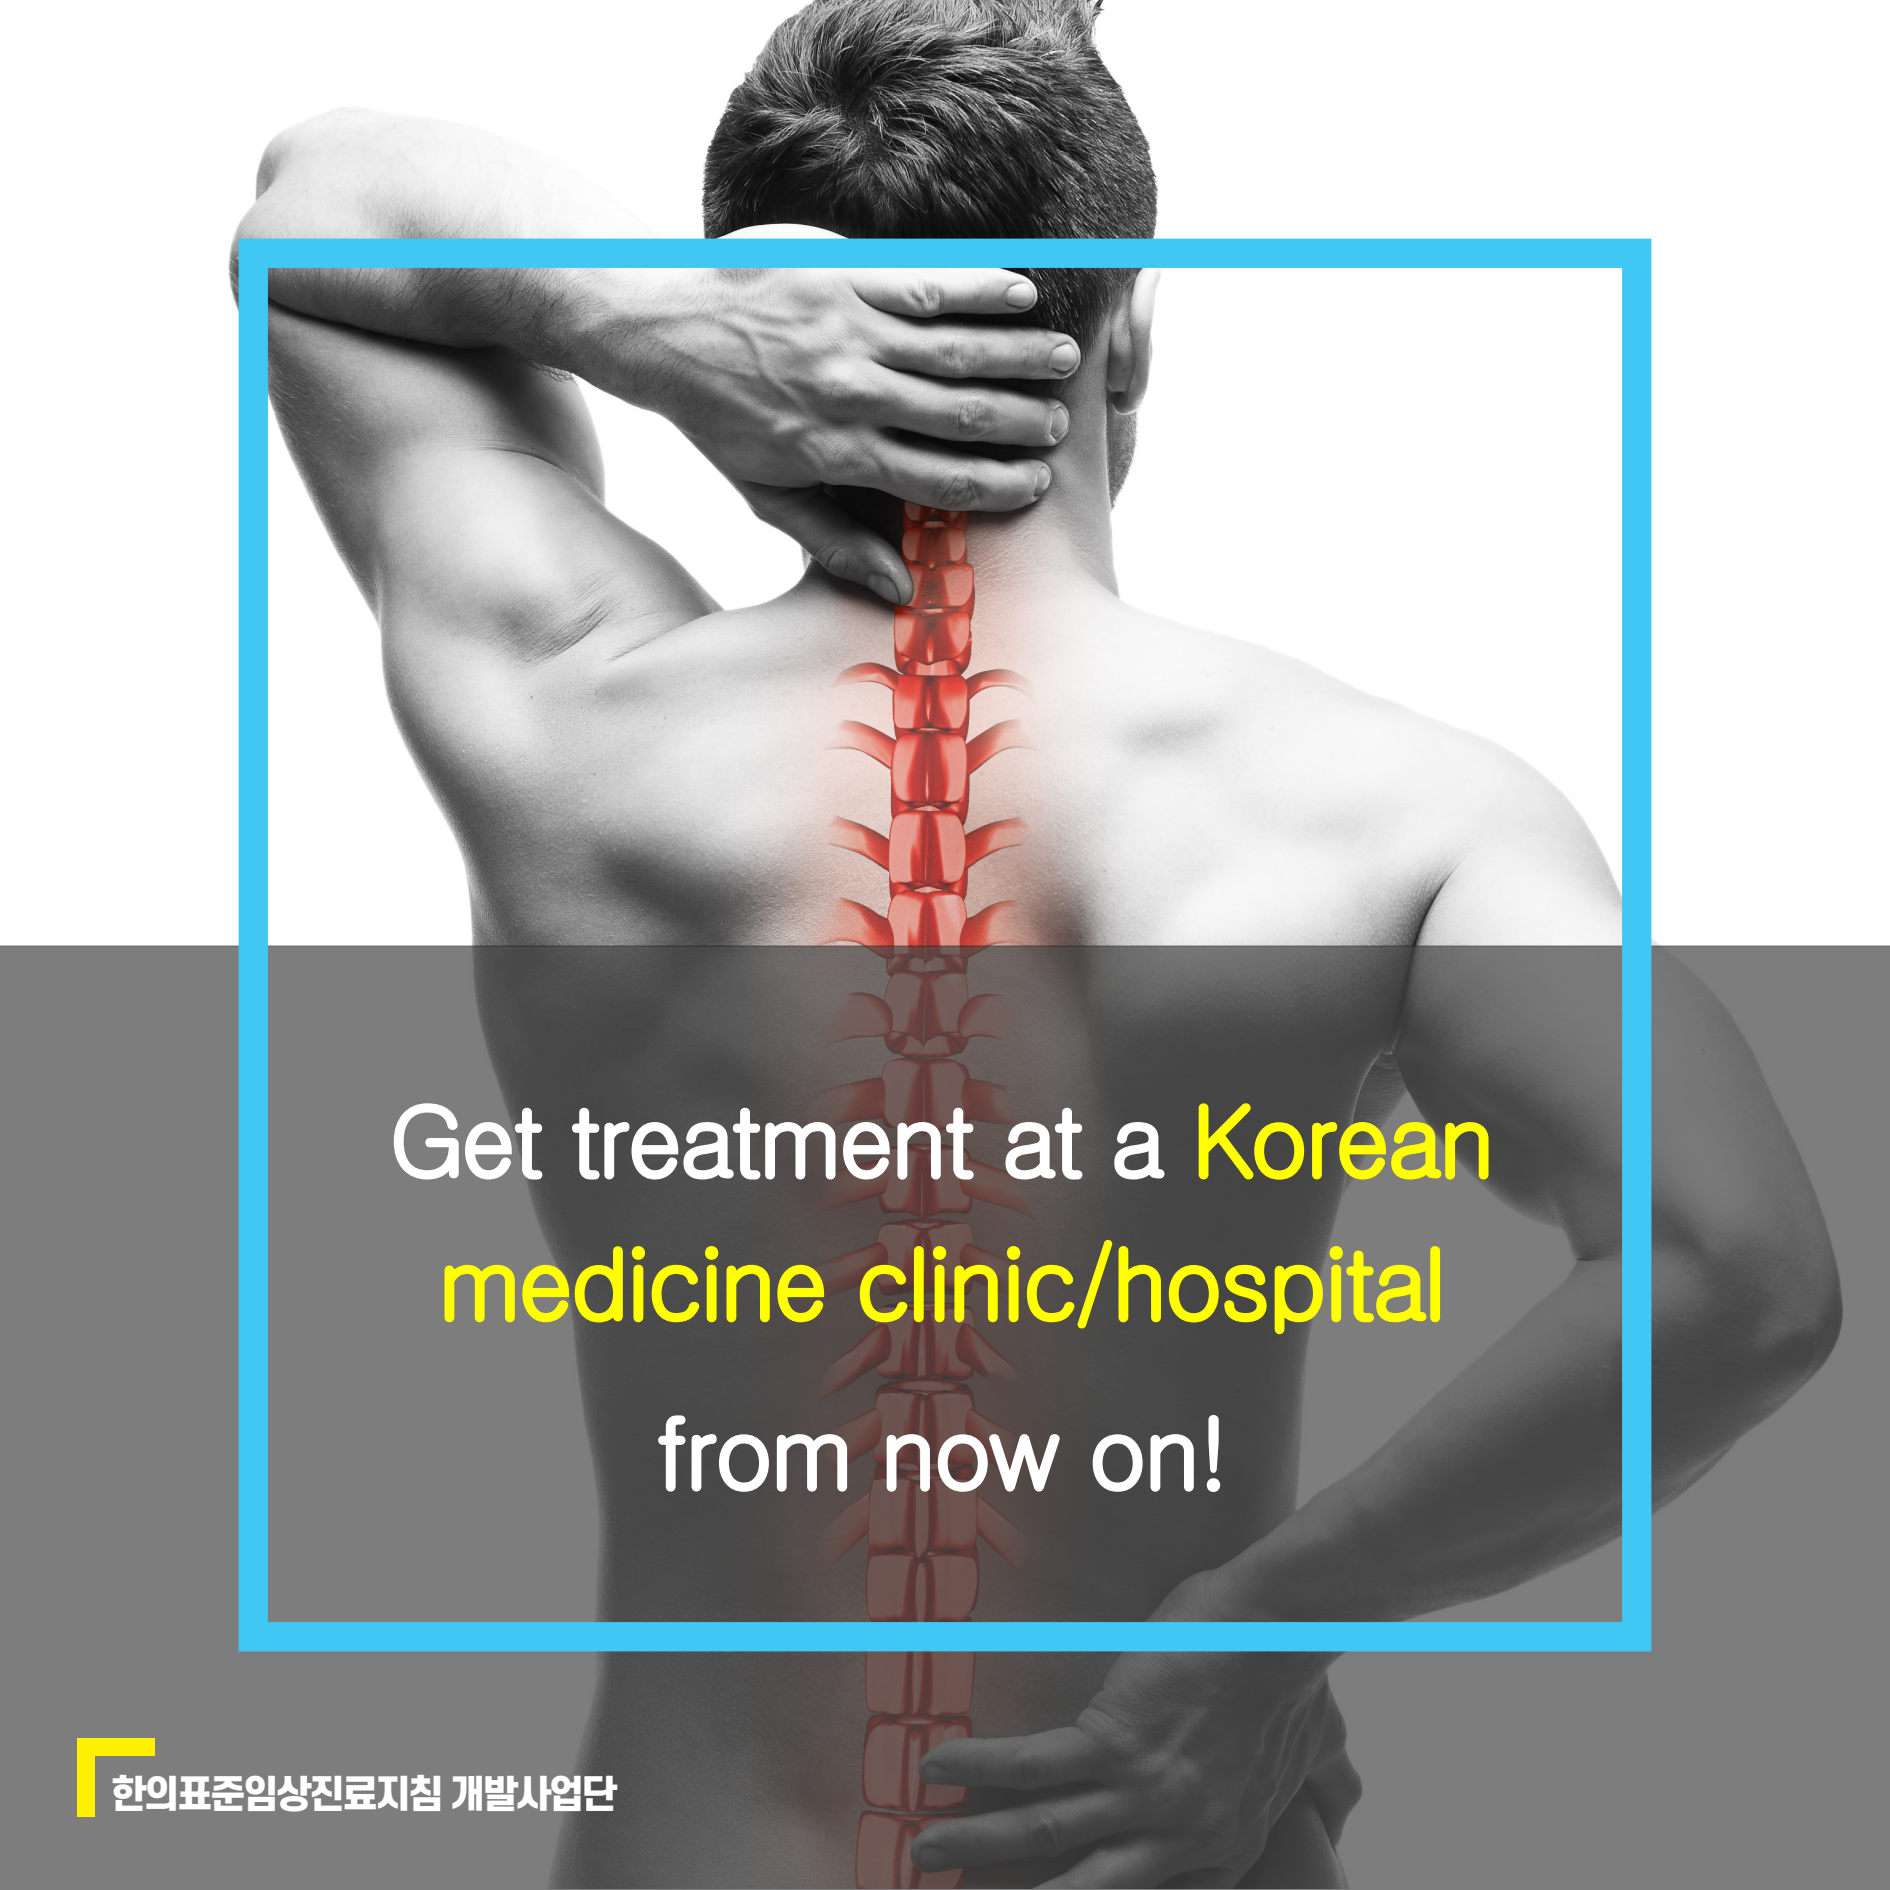A grayscale photograph of a man's back, viewed from behind. He is holding his right hand to his neck. A translucent red overlay of a human spine is centered on his back, extending from the neck down to the lower back. A thick blue rectangular border frames the central portion of the image, enclosing the text and the spine overlay.

Get treatment at a **Korean**  
**medicine clinic/hospital**  
from now on!
