# Supplementary material for: Adaptation and Dissemination of Korean Medicine Clinical Practice Guidelines for Traffic Injuries
Source: Healthcare (Basel). 2022 Jun 22;10(7):1166. doi: 10.3390/healthcare10071166 (PMC9316782; doi:10.3390/healthcare10071166)
Supplement: Supplementary file 1 [file healthcare-10-01166-s001.zip › Supplementary Table S1.pdf]

Supplementary Table S1. The member list of the committees

| Committees                      | Position              | Name             | Institution                                                                                                | Region  | Role/Specialty                                                                                        |
|---------------------------------|-----------------------|------------------|------------------------------------------------------------------------------------------------------------|---------|-------------------------------------------------------------------------------------------------------|
| Development<br>Committees       | member                | Byung-Cheul Shin | Pusan National University Korean Medicine Hospital                                                         | Yangsan | Principal investigator (specialist of Korean Medicine Rehabilitation)                                 |
|                                 |                       | Eui-Hyoung Hwang | Pusan National University Korean Medicine Hospital                                                         | Yangsan | hands-on worker of development CPG /Methodology expert (specialist of Korean Medicine Rehabilitation) |
|                                 |                       | Eun-Jung Lee     | Daejeon University Korean Medicine Hospital                                                                | Daejeon | Development of CPG (specialist of Korean Medicine Rehabilitation)                                     |
|                                 |                       | Jae-Heung Cho    | Kyung Hee University Korean Medicine Hospital                                                              | Seoul   | Development of CPG (specialist of Korean Medicine Rehabilitation)                                     |
|                                 |                       | In-Hyuk Ha       | Jaseng Korean Medicine Hospital                                                                            | Seoul   | Development of CPG (specialist of Korean Medicine Rehabilitation)                                     |
|                                 |                       | Sung-Chul Kim    | Wonkwang University Gwangju Korean Medicine Hospital                                                       | Gwangju | Development of CPG (specialist of Korean Medicine Rehabilitation)                                     |
|                                 |                       | Jae-Hong Kim     | Dongshin University Korean Medicine Hospital                                                               | Naju    | Development of CPG (specialist of Korean Medicine Rehabilitation)                                     |
|                                 |                       | Jong-In Kim      | Kyung Hee University Korean Medicine Hospital                                                              | Seoul   | Development of CPG (specialist of Acupuncture & Moxibustion Medicine)                                 |
|                                 |                       | Hyung-Won Kang   | Wonkwang University Korean Medicine Hospital                                                               | Iksan   | Development of CPG (specialist of Korean Medicine Neuropsychiatry)                                    |
|                                 |                       | Ki-Byung Kim     | Chamsol Korean Medicine Clinic                                                                             | Daejeon | Development of CPG (Korean Medicine practitioner)                                                     |
| Review<br>advisory<br>committee | and member            | Youn-Seok Ko     | College of Korean Medicine, Woosuk University (Korean Society of Chuna Manual Medicine for Spine & Nerves) | Jeonju  | Review (clinical specialist - specialist of Korean Medicine Rehabilitation)                           |
|                                 |                       | Seung-Ryong Yeom | College of Korean Medicine, Wonkwang University (The Society of Korean Medicine Rehabilitation.)           | Iksan   | Review (clinical specialist - specialist of Korean Medicine Rehabilitation)                           |
|                                 |                       | Jong-Uk Kim      | College of Korean Medicine, Woosuk University (Korean Acupuncture & Moxibustion Medicine Society)          | Jeonju  | Review (clinical specialist - specialist of Acupuncture & Moxibustion Medicine)                       |
|                                 |                       | Sung-Youl Choi   | College of Korean Medicine, Gacheon University (Korean Society of Oriental Neuropsychiatry)                | Incheon | Review (clinical specialist - specialist of Korean Medicine Neuropsychiatry)                          |
|                                 |                       | Jae-Won Yang     | Korean pharmacopuncture institute                                                                          | Seoul   | Delphi research and Review (advice and review on medical reality)                                     |
|                                 |                       | Ji-Hun Park      | Society of sports Korean Medicine                                                                          | Ansan   | Delphi research and Review (advice and review on medical reality)                                     |
|                                 |                       | Jun-Hwan Lee     | Korea Institute of Oriental Medicine                                                                       | Daejeon | Review of Level of Evidence and Grade of Recommendation (Methodology expert)                          |
|                                 |                       | Chang-Sop Yang   | Korea Institute of Oriental Medicine                                                                       | Daejeon | Review of Level of Evidence and Grade of Recommendation (Methodology expert)                          |
|                                 |                       | Yun-Yeop Cha     | Sanji University Korean Medicine Hospital                                                                  | Wonju   | Review (clinical specialist - specialist of Korean Medicine Rehabilitation)                           |
|                                 |                       | Min-Kyu Kim      | Jaseng Korean Medicine Hospital                                                                            | Seoul   | Agreement (RAM) and review                                                                            |
|                                 | Practitioner<br>panel | Ha-Neul Kim      | Jaseng Korean Medicine Hospital                                                                            | Seoul   | Agreement (RAM) and review                                                                            |

CPG; Clinical Practice Guideline, RAM; RAND-UCLA Appropriateness Method
